# Supplementary material for: Dynamic Resistant Starch Accumulation in Contrasting Wheat Genotypes Highlights the Lipid Metabolic Pathway Related to Resistant Starch Synthesis
Source: MDPI journal article supplement (doi:10.3390/agriculture12020308), 2022-02-21
Supplement: s1 [file s1]

## **Figure legends**

**Supplementary Figure S1.** The pathway of glycerophospholipid metabolism. The

DEGs involved in this pathway are indicated by red boxes

**Supplementary Figure S2.** Validation of candidate genes by qRT-PCR. Correlation between the fold change analysed by RNA-seq (y-axis) and data obtained using qRT-PCR (x-axis).
